# Supplementary material
Source: PubMed Central journal article supplement (PMC1815263)

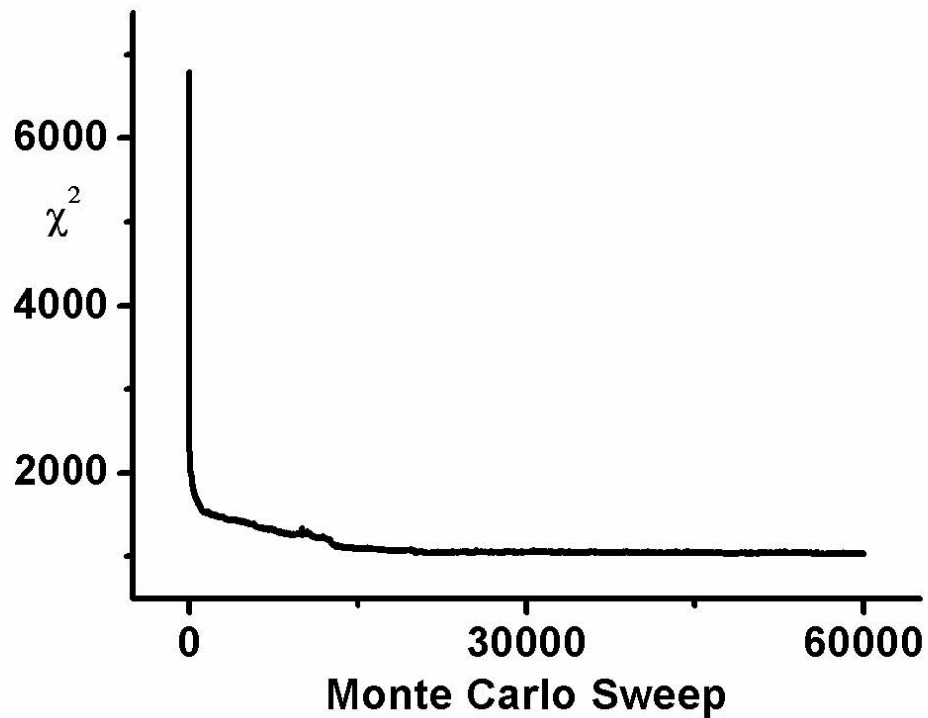

Supplement: pnas_0611005104_1.pdf [file pnas_0611005104_1.pdf]

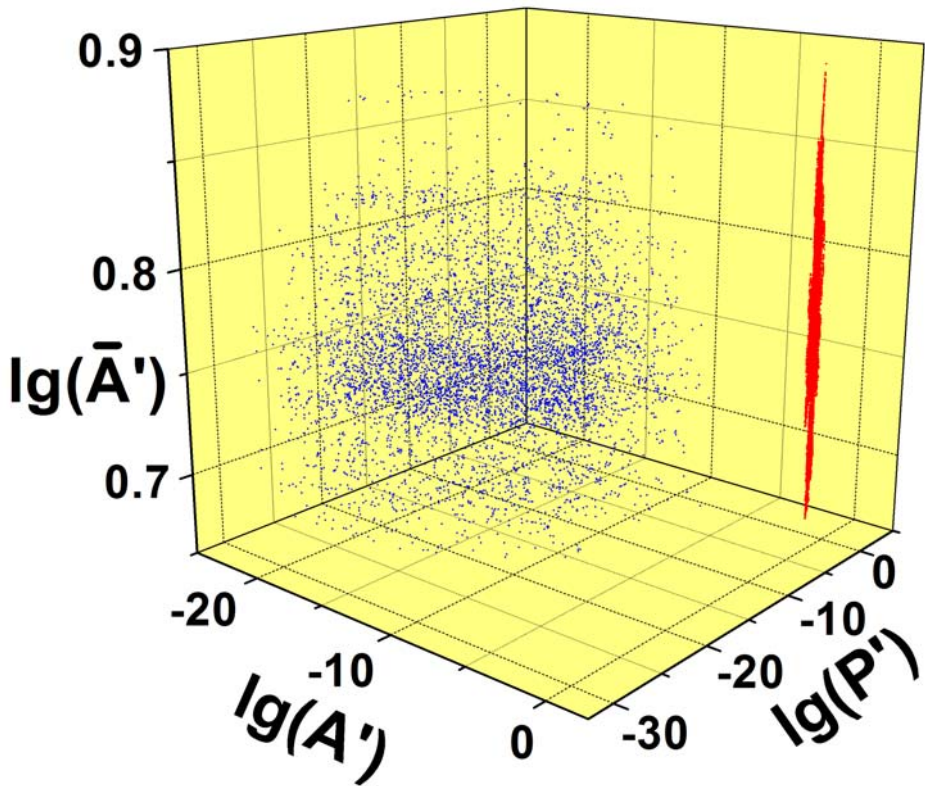

Supplement: pnas_0611005104_2.pdf [file pnas_0611005104_2.pdf]

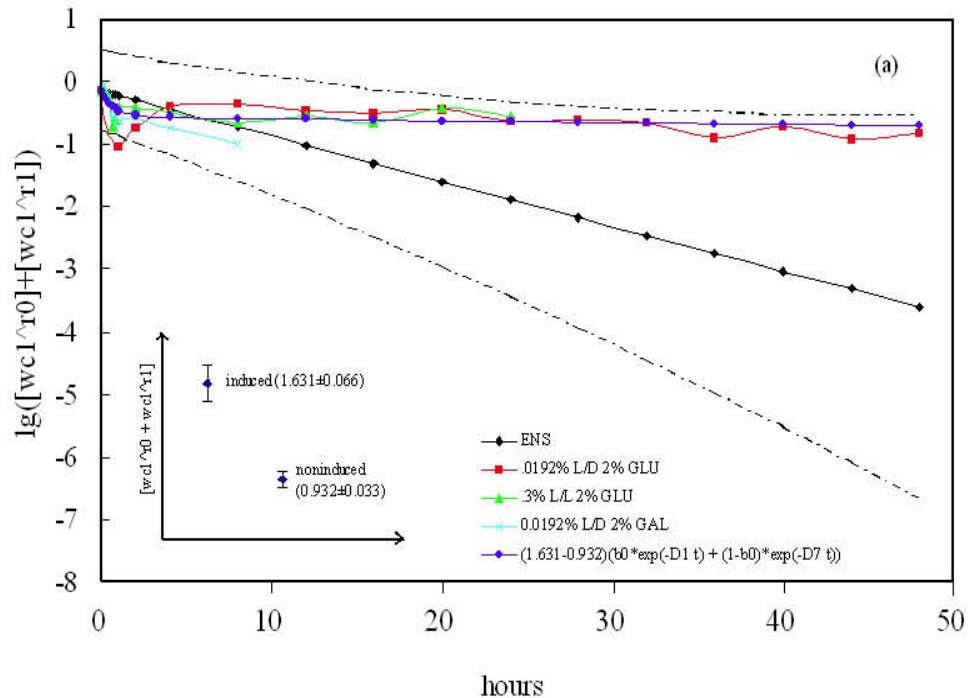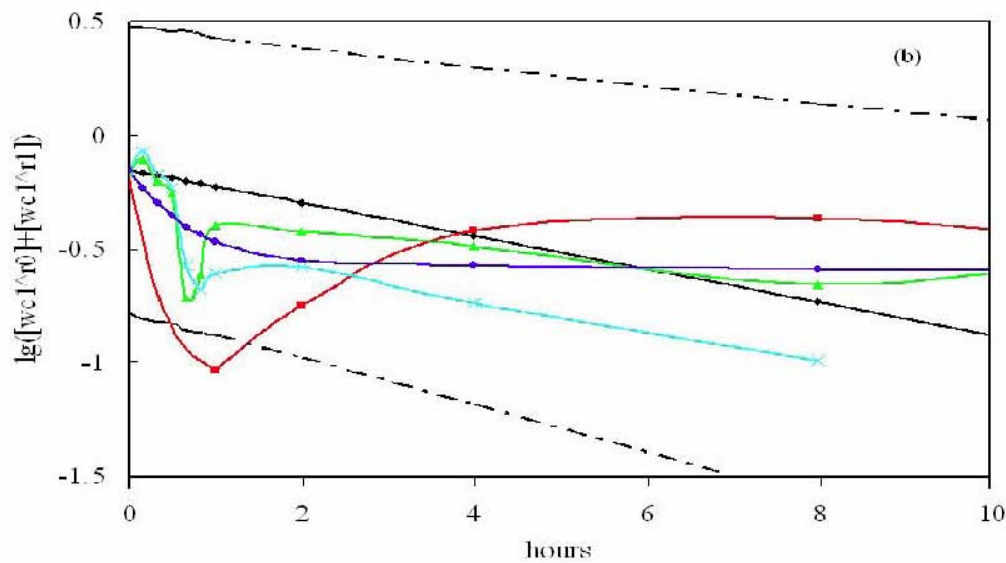

Supplement: pnas_0611005104_3.pdf [file pnas_0611005104_3.pdf]
